# Supplementary material for: Small Molecules Targeting 3C Protease Inhibit FMDV Replication and Exhibit Virucidal Effect in Cell-Based Assays
Source: MDPI journal article supplement (doi:10.3390/v15091887), 2023-09-06
Supplement: s1 [file s1]

Supplementary Materials

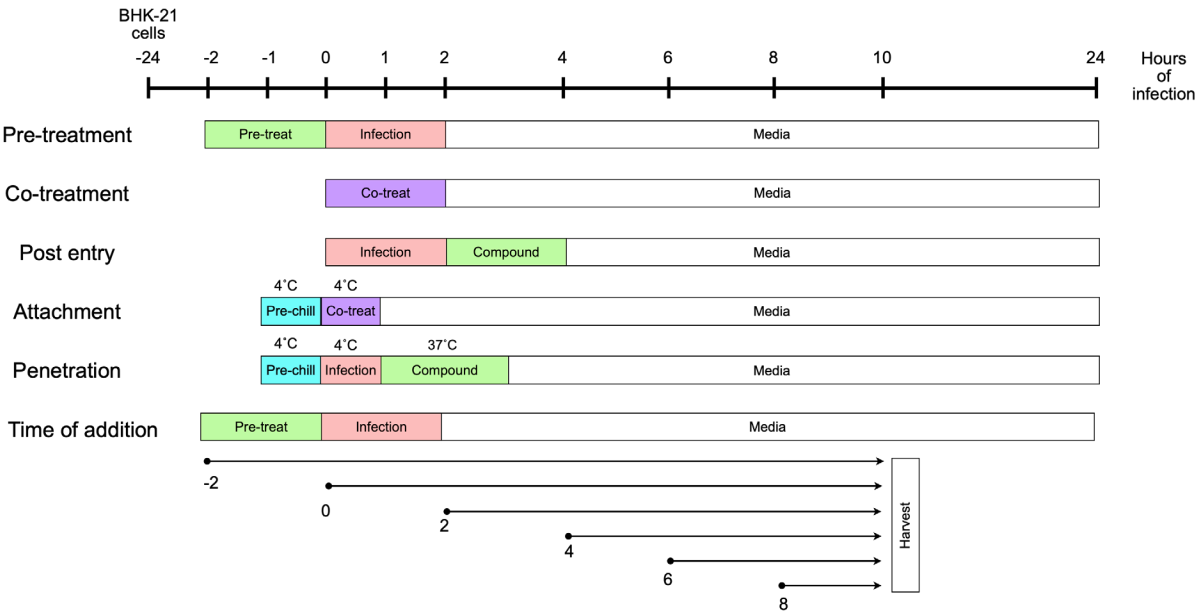

**Figure S1.** The experimental design of antiviral activity studies.

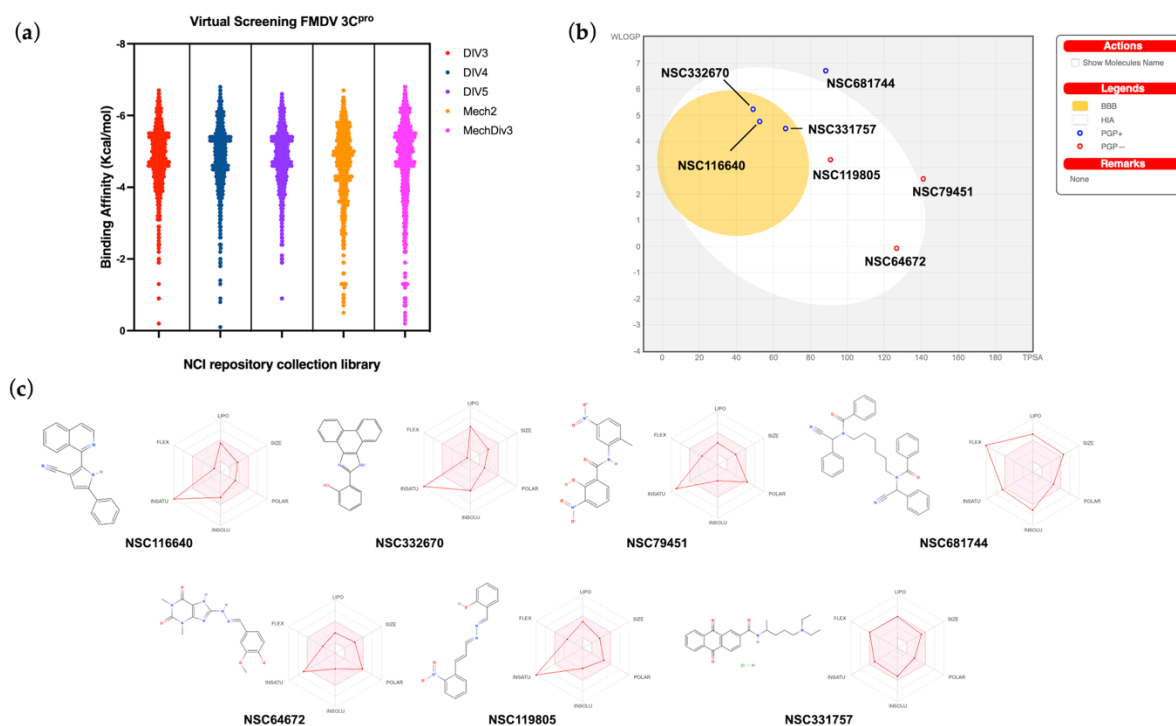

**Figure S2.** Structure-based virtual screening of NCI repository collection library. **(a)** The binding affinity of the compounds in each library. **(b)** The BOILED-Egg prediction of the compounds depicts the gastrointestinal absorption and brain penetration. BBB (yellow zone; blood-brain barrier) and HIA (white zone; human intestinal absorption). Blue dot (PGP+) and red dot (PGP-) represent positive and negative biochemical efflux (e.g., P-glycoprotein pumping out substrates from central nervous system (CNS)), respectively. **(c)** The initial hit compounds were selected for further cell-based assay, which the predicted physicochemical space presents the pink color zone as for oral bioavailability. LIPO (lipophilicity):  $-0.7 < \text{XLOGP3} < +5.0$ ; SIZE:  $1560 \text{ g/mol} < \text{MW} < 500 \text{ g/mol}$ ; POLAR (polarity):  $20 \text{ \AA}^2 < \text{TPSA} < 130 \text{ \AA}^2$ ; INSOLU (insolubility):  $-6 < \text{LogS (ESOL)} < 0$ ; INSATU (insaturation):  $0.25 < \text{Fraction Csp3} < 1$ ; FLEX (flexibility):  $0 < \text{Number rotatable bonds} < 9$ .

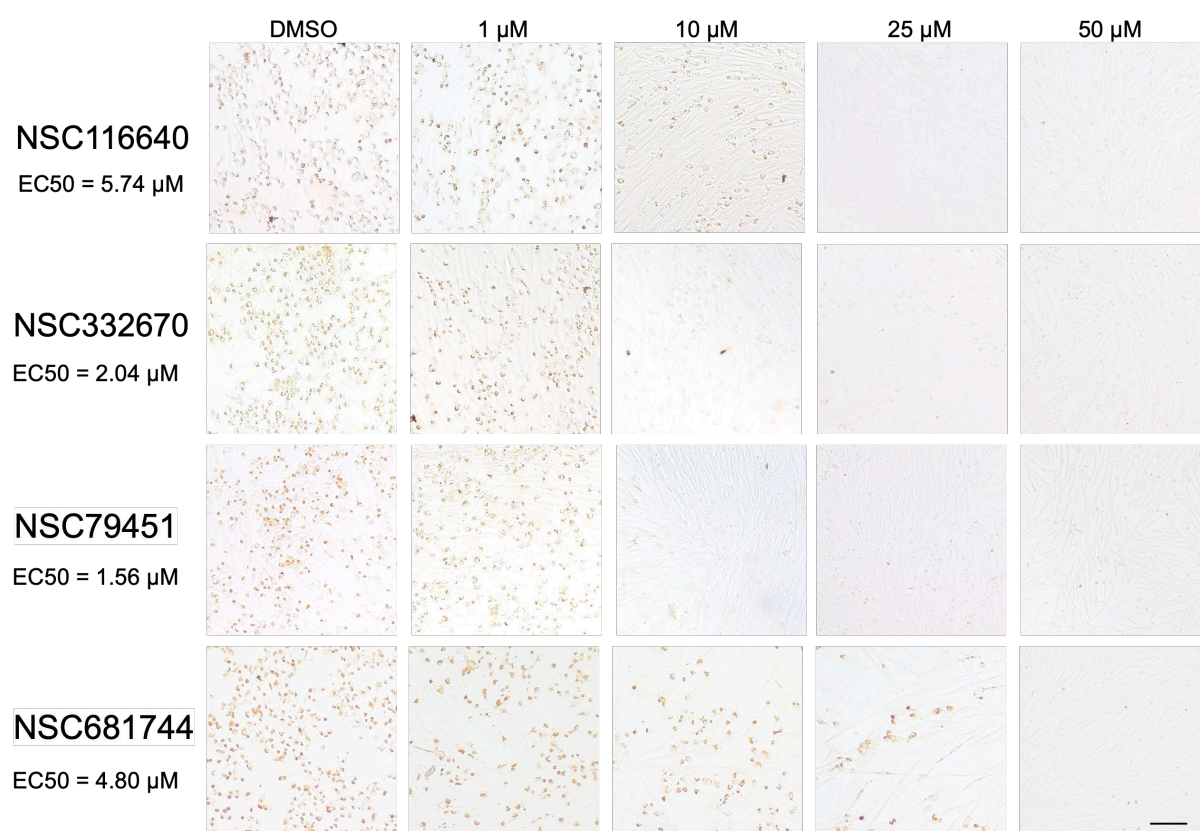

**Figure S3.** The antiviral activity of co-treatment assay which the serially diluted compounds were co-incubated with FMDV (10 TCID<sub>50</sub>/well). Scale bar is 100  $\mu$ M.

(a) NSC116640

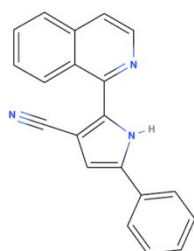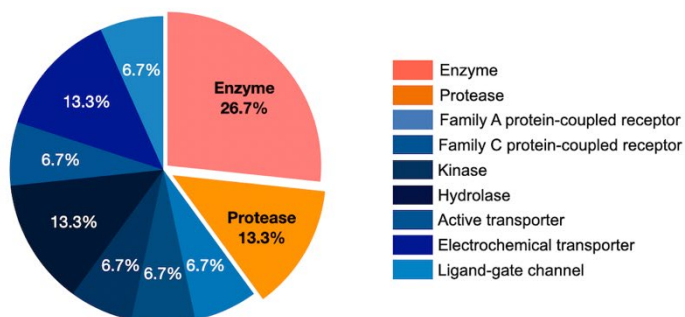

(b) NSC332670

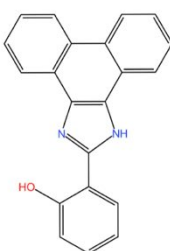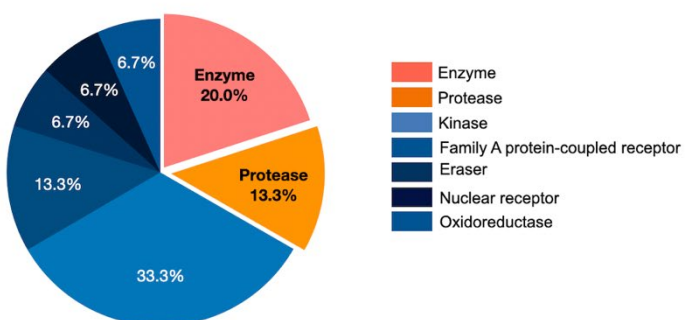

**Figure S4.** Target prediction of compounds (a) NSC116640 and (b) NSC332670.
